# Supplementary material for: Retinal Vascular Signs as Screening and Prognostic Factors for Chronic Kidney Disease: A Systematic Review and Meta-Analysis of Current Evidence
Source: MDPI journal article supplement (doi:10.3390/jpm11070665), 2021-07-15
Supplement: s1 [file s1]

| Table S1. Summary of bias findings using the QUIPS tool |                     |                 |                               |                     |                   |                                    |                      |
|---------------------------------------------------------|---------------------|-----------------|-------------------------------|---------------------|-------------------|------------------------------------|----------------------|
| Author                                                  | Study participation | Study attrition | Prognostic factor measurement | Outcome measurement | Study confounding | Statistical analysis and reporting | Overall risk of bias |
| Baumann (2014)                                          | Low                 | Moderate        | Low                           | Low                 | Moderate          | Low                                | Low                  |
| Benitez (2012)                                          | Low                 | High            | Moderate                      | Low                 | Moderate          | Low                                | Moderate             |
| Grunwald (2014)                                         | Low                 | Low             | Low                           | Low                 | Moderate          | Low                                | Low                  |
| Sabanayagam (2011)                                      | Low                 | Low             | Low                           | Low                 | Low               | Low                                | Low                  |
| Wong (2003)                                             | Low                 | High            | Low                           | Low                 | Low               | Low                                | Moderate             |
| Yau (2011)                                              | Low                 | Unknown         | Low                           | Low                 | Low               | Low                                | Low                  |
| Yip (2015)                                              | Low                 | Low             | Low                           | Moderate            | High              | Low                                | Moderate             |
| Yip (2017)                                              | Low                 | High            | Low                           | Low                 | Low               | Low                                | Moderate             |
| Awualarbi (2011)                                        | Low                 | High            | Low                           | Low                 | Low               | Low                                | Moderate             |
| Bao (2015)                                              | Low                 | Unknown         | Low                           | Moderate            | Moderate          | Low                                | Moderate             |
| Baumann (2009)                                          | Moderate            | Unknown         | High                          | Low                 | High              | High                               | High                 |
| Benitez-Aguirre (2018)                                  | Low                 | Low             | Low                           | Low                 | High              | Low                                | Moderate             |
| Broe (2014)                                             | Low                 | Moderate        | Moderate                      | Low                 | Low               | Low                                | Low                  |
| Broe (2014)                                             | Low                 | Moderate        | Low                           | Low                 | Low               | Low                                | Low                  |
| Cankurtaran (2019)                                      | Low                 | Unknown         | Low                           | Low                 | High              | Low                                | Moderate             |
| Edwards (2005)                                          | Low                 | Moderate        | Low                           | Low                 | Low               | Low                                | Low                  |
| Garcia-Ortiz (2012)                                     | Low                 | Unknown         | Low                           | High                | High              | Low                                | High                 |
| Garrido (2019)                                          | High                | Unknown         | Low                           | Low                 | High              | Low                                | High                 |
| Grauslund (2009)                                        | Low                 | Low             | Low                           | Low                 | Low               | Low                                | Low                  |

|                        |          |          |          |          |          |          |                 |
|------------------------|----------|----------|----------|----------|----------|----------|-----------------|
| Grauslund (2010)       | Low      | Low      | Low      | Low      | Low      | Low      | <b>Low</b>      |
| Grunwald (2019)        | Low      | High     | Low      | Low      | Low      | Low      | <b>Low</b>      |
| Gu (2015)              | Low      | Moderate | Low      | Low      | Moderate | Low      | <b>Low</b>      |
| Hwang (2016)           | Low      | Unknown  | Low      | Low      | Low      | Low      | <b>Low</b>      |
| Keel (2017)            | Low      | Unknown  | Low      | Low      | Low      | Low      | <b>Low</b>      |
| Klein (2010)           | Low      | Unknown  | Low      | Low      | Moderate | Moderate | <b>Moderate</b> |
| Liew (2011)            | Low      | Unknown  | Low      | Low      | High     | Moderate | <b>High</b>     |
| Lim (2013)             | Low      | Unknown  | Low      | Low      | Low      | Low      | <b>Low</b>      |
| Mckay (2018)           | Low      | Unknown  | Moderate | Unknown  | Moderate | Low      | <b>High</b>     |
| Mottl (2012)           | Low      | Low      | Low      | Low      | Low      | Low      | <b>Low</b>      |
| Ooi (2011)             | Low      | Low      | Low      | Low      | High     | Moderate | <b>Moderate</b> |
| Phan (2016)            | High     | Unknown  | High     | High     | High     | High     | <b>High</b>     |
| Rasmusse<br>n (2017)   | Moderate | Low      | Low      | Moderate | Moderate | Low      | <b>Moderate</b> |
| Sabanayag<br>am (2008) | Low      | Unknown  | Low      | Low      | Low      | Low      | <b>Low</b>      |
| Sabanayag<br>am (2009) | Low      | Unknown  | Low      | Low      | Low      | Low      | <b>Low</b>      |
| Sasongko (2012)        | Low      | Unknown  | Low      | Low      | Moderate | Low      | <b>Low</b>      |
| Sng (2010)             | Low      | Unknown  | Low      | Low      | Low      | Low      | <b>Low</b>      |
| Tamadon (2015)         | Moderate | Unknown  | High     | High     | High     | High     | <b>High</b>     |
| Vadala (2018)          | Moderate | Unknown  | Low      | Low      | High     | High     | <b>High</b>     |
| Wong (2004)            | Low      | High     | Low      | Low      | Low      | Low      | <b>Low</b>      |
| Zhang (2014)           | Low      | Unknown  | Low      | Low      | Low      | Low      | <b>Low</b>      |
| Ha M (2019)            | Low      | Low      | Low      | Unknown  | High     | High     | <b>High</b>     |
| Lee (2014)             | Low      | Low      | Low      | Unknown  | Moderate | Low      | <b>Low</b>      |
